# Supplementary material for: The Coupling of Carbon, Nitrogen and Sulphur Transformational Processes in River Sediments Based on Correlationship among the Functional Genes
Source: Copernicus journal article supplement (doi:10.5194/bg-2018-369), 2018-09-04
Supplement: Supplementary file [file bg-2018-369-AC1-supplement.pdf]

1 **The Coupling of Carbon, Nitrogen and Sulphur Transformational Processes in River Sediments**  
2 **Based on Correlationship among the Functional Genes**

3 Mingzhu Zhang<sup>1</sup>, Yang Li<sup>1</sup>, Qingye Sun<sup>1</sup>, Piaoxue Chen<sup>1</sup>, Xuhao Wei<sup>1</sup>

4 <sup>1</sup>School of Resources and Environmental Engineering, Anhui University, Hefei, Anhui Province,  
5 230601, China

6 *Correspondence to:* Qingye Sun (sunqingye@ahu.edu.cn)

7 **Abstract:** Microorganisms in sediments play an important role in C-, N- and S-cycles by regulating  
8 forms and contents of these elements. The coupled system or synergistic reaction among three  
9 elemental cycles can effectively alleviate the pollution of C, N, and S in sediments. However,  
10 ecological processes coupling C-, N- and S-cycles in sediments are still poorly understood. In order to  
11 understand the ecological processes mediated by microorganisms living in river sediments, a total of  
12 135 sediment samples were collected from Huaihe River and its branches located in the Northern of  
13 Anhui Province, the abundance of functional marker genes (*mcrA*, *pmoA*, *cmo*, *amoA*, *hzo*, *nirK*, *nirS*,  
14 *nosZ*, *dsrB*, *aprA*), involving in C-, N- and S-transformation, were determined by *q*PCR. The  
15 correlation among functional genes from 135 river sediment samples was calculated. We supposed  
16 that the correlationship among functional genes could be used as a reference index speculating the  
17 coupled systems of C-N-S in this reasearch, then the distinct coupling relation of C-N-S was revealed,  
18 and probable genetic mechanisms were also expounded based on the hypothesis. The study found that  
19 *amoA*-AOA and *dsrB* possibly played a secondary role, while S-functional gene (*aprA*), C-functional

20 gene (*mcrA*) and N-functional gene (*hzo*) were the key functional genes that participate in the coupled  
21 processes in the elemental biogeochemical cycle. The results also demonstrated that C, N might have  
22 combined effects on the coupling of carbon, nitrogen and sulphur transformation.

23 **Keywords:** river sediment, coupled systems, C, N, and S cycles, functional genes

24

## 25 **1 Introduction**

26 Rivers play a substantial part in elemental biogeochemical processes (Aufdenkampe et al., 2011),  
27 which can regulate the carbon (C), nitrogen (N) and sulphur (S) cycles and act as a good indicator of  
28 environmental changes (Crump et al., 2009; Williamson et al., 2008). However, the nutrient elements  
29 (such as carbon, nitrogen and sulphur) originating from domestic sewage, farm drainage, industrial  
30 effluent, etc. flow into the river, and deposit into the sediments (Cheng et al., 2014; Liu et al.,  
31 2014; Fonti et al., 2015), which lead to the deterioration of river ecosystems.

32 Studies demonstrated that microorganisms in the artificial environments could couple the  
33 transformation processes of different elements by inter-specific cooperation or coordination of  
34 inter-gene from the same species (Zhi and Ji, 2014). In coupling with methane-nitrogen cycle,  
35 anammox-methanogenesis (Bai et al., 2013), nitrite-driven anaerobic methane oxidation (Ettwig et al.,  
36 2010), aerobic methane oxidation-denitrification (AME-D) (Knittel and Boetius, 2008; Modin et al.,  
37 2008; Modin et al., 2007) and denitrification-methanogenesis (Kodera et al., 2017; Wang et al., 2017)

38 have been confirmed. For the coupling of S and N cycles, Fdz-Polanco et al. (2001) firstly approved  
39 the sulfate-reducing anaerobic ammonium oxidation (SRAO) process to explain “abnormal” losses of  
40 nitrogen and sulfate. And subsequently several laboratory studies were conducted for purpose of  
41 speculate the pathway of SRAO (Rikmann et al., 2012;Zhang et al., 2009;Schrum et al., 2009). The  
42 occurrence of microaerophilic sulfate and nitrate co-reduction system has been previously reported  
43 (Bowles et al., 2012;Brunet and Garciagil, 1996). For the coupling of C and S cycles, the pathway of  
44 sulfate-dependent anaerobic methane oxidation had been discovered, which was common completed  
45 by anaerobic methanotrophic archaea and sulfate-reducing bacteria (M et al., 2003).

46 Recently, the coupling cycle between different elements in natural or constructed wetlands, such  
47 as methane oxidation coupled to nitrogen fixation (Larmola et al., 2014), methane oxidation coupled  
48 to ammonium oxidation (Zhu et al., 2010), methane oxidation coupled to denitrification (Zhu et al.,  
49 2016;Long et al., 2016;Long et al., 2017;Luo et al., 2017;Zhang et al., 2018), methane oxidation  
50 coupled to sulfate reduction (Xu et al., 2014;Weber et al., 2017;Emil et al., 2016), etc., received  
51 extensive attention. The coupling cycle between different elements was mainly driven by functional  
52 groups from bacteria and/or archaea living in sediments. The enzymes coded by functional gene(s) in  
53 functional groups catalyze each reaction step in the biogeochemical cycle of elements. At presently,  
54 the functional genes have been regarded as appropriate indicators for the related biogeochemical  
55 processes in the C and N cycles (Petersen et al., 2012;Rocca et al., 2014). The development of

56 molecular biological technique greatly facilitate the quantitation of functional genes in environmental  
57 samples (Lammel et al., 2015;Petersen et al., 2012). Many studies have used the abundance of  
58 functional groups or functional genes involving in elemental cycle to explore the elemental metabolic  
59 pathways in different ecosystems (Bru et al., 2011;Xie et al., 2014;Smith et al., 2015).

60 Studies have shown that the microbial functional groups that complete a biogeochemical reaction  
61 may come from different microbial groups, and the same type of bacteria or archaea may also  
62 participate in different steps of the biogeochemical cycle. Therefore, compared with the microbial  
63 functional group, the correlation among the functional genes can not only better reveal the  
64 coupling relationship of elemental metabolic processes in environmental media (especially for some  
65 natural ecosystems or more complex environmental media, such as sediments), but also predict some  
66 undetected coupling reactions. The main aims of this study were: (1) to analyze the correlation among  
67 the different functional genes related to some known coupled metabolic processes in sediments, and (2)  
68 to predict the possible coupling systems in sediments based on the correlation among the functional  
69 genes; and (3) to illustrate the key functional genes that participate in certain specific metabolic  
70 processes or steps in the elemental biogeochemical cycle.

71

## 72 **2 Materials and Methods**

### 73 **2.1 Site description**

74 The Huaihe River is located in the eastern China, watershed area of approximately 270,000 km<sup>2</sup>,  
75 involving 5 Provinces (Henan, Anhui, Shandong, Jiangsu and Hubei) and 165 million population,  
76 situated in a transition zone of northern-southern climates in China (Meng et al., 2014;He et al., 2015)  
77 and belongs to monsoon climate from north subtropical to south warm temperature, and from humid  
78 to semihumid-semiarid. The average annual precipitation and the annual evaporation in the basin are  
79 some 883mm and 900-1500mm, respectively. The rainfall of flood season (June to September) usually  
80 amounts to 70% of the annual value. The average annual temperature ranges 13.2-15.7°C and frost  
81 free period is about 200-240 day. In the basin, a complex interaction of meteorological and  
82 hydrological processes frequently trigger and exacerbate flood and drought events (Wang et al.,  
83 2014;Zhang et al., 2015). Water resources per capita and per unit area in Huaihe River basin is less  
84 than one-fifth of the Chinese average. And more than 50% of the water resources are over-exploited  
85 (Jiang, 2011). In this basin, agricultural cultivation and livestock have a long history. Textile,  
86 household appliances, steel, cement and fertilizer, as the major industries, mainly distribute along the  
87 main stream and branches of Huaihe River, which are running through the main economic areas in the  
88 middle-eastern of China (Tian et al., 2013). In recent decades, a large number of nutrient from farm  
89 drainage, domestic sewage, industrial effluent, etc., had entered into the main stream and branches and  
90 deposited in the river sediment.

## 91 **2.2 Sample collection and pretreatment**

92 In this study, the main stream and the leftward branches located in the Anhui Province were  
93 chosen to do as the investigated area. The length of main stream of Huaihe River in Anhui Province is  
94 more than 400km and its leftward branches in Anhui Province mainly include Honghe river, Guhe  
95 River, Runhe River, Shayinghe River, Xifeihe River, Cihuai River, Qianhe River, Guohe River,  
96 Beifeihe River, Xiehe-Huihe River, Tuohe River, Bianhe River, Suihe River, etc. All branches  
97 investigated are situated in Wanbei plain, which is a part of North China Plain. A total of 135 sections  
98 from main stream and its branches were chosen to collect the sediment samples. Before field sampling,  
99 all of sampling sections were set by the remote sensing map (Fig 1).

100 In each sampling section, 5 subsamples of surface sediment (depth: 0-10cm) were collected by  
101 Pedersen sampler and then mixed into a sample. The sediment sample was immediately loaded into a  
102 sterile self-sealing bag and then stored in the incubator with 4°C in the field. After returning to  
103 laboratory, each sample was divided into two parts, one was used to analyze the chemical properties  
104 and ~~another~~the other was directly extracted DNA for the molecular biological test. The samples using  
105 to analyze chemical properties were desiccated by the method of vacuum freeze drying and then  
106 screened. After screening, the samples were loaded into the self-sealing bag and then stored in the  
107 refrigerating cabinet with -20°C until the chemical analysis was carried out.

### 108 **2.3 Chemical analysis of sediment samples**

109 The pH was assessed by the Mettler Toledo FE20 pH meter (sediment<sub>mass</sub>: H<sub>2</sub>O<sub>volume</sub>=1g: 5ml).

110 The organic matter (OM) was determined by the loss of ignition (LOI) in a muffle furnace at  $550\pm 5^{\circ}\text{C}$   
111 for 6 h. The total nitrogen (TN) content was measured using the Kjeldahl method. Concentrations of  
112  $\text{NH}_4^+\text{-N}$ ,  $\text{NO}_3^-\text{-N}$  and  $\text{NO}_2^-\text{-N}$  ~~and~~ in sediment samples were determined using a UV-1800  
113 spectrophotometer (Shimadzu, Kyoto, Japan). SMT (standard measurement and test) (Ruban et al.,  
114 2001) method is used to measure the total phosphorus (TP) inorganic phosphorus (IP) and organic  
115 phosphorus(OP) in the sediment.

#### 116 **2.4 DNA extraction**

117 Total DNA in sediment samples were extracted by using the PowerSoil<sup>®</sup> DNA isolation kit (Mo  
118 Bio Carlsbad USA) in accordance with the manufacturer's instructions. Each extracted genomic DNA  
119 was preserved at  $-20^{\circ}\text{C}$  until use.

#### 120 **2.5 Real-time fluorescent quantitative PCR**

121 Quantitative analyses of functional genes, including *amoA* of AOA, *amoA* of AOB, *hzo*, *nirK*,  
122 *nirS*, *nosZ*, *mcrA*, *pmoA*, *dsrB* and *aprA*, were performed. The information on the primers selected for  
123 amplification are listed in supporting information (Table S1). Real-time PCRs were implemented on a  
124 Stepone real-time PCR system (Applied Biosystems USA). Each PCR mixture (10 uL) was composed  
125 of 5uL of Bestar<sup>®</sup> SYBR qPCR Master Mix Ex Taq<sup>™</sup> II (2 $\times$ ), 0.25 uL of each primer (concentration  
126 of 10 uM), 0.2 uL of ROX reference dye (50 $\times$ ), 3.3 uL of ddH<sub>2</sub>O and 1uL of template DNA (Bestar  
127 Biosystem, German). After generating PCR fragments of the respective functional genes using M13

128 PCR from clones, standard curves for real-time PCR were prepared based on a serial dilution of  
129 known copies of PCR fragments. The R<sup>2</sup> value of each standard curve was above 0.99.

## 130 **2.6 Data analysis**

131 To further investigate the interactions among the environmental parameters, Pearson correlation  
132 analysis was applied to determine the significant correlations among the chemical properties.  
133 Correlation analysis was calculated to evaluate ecological associations among different functional  
134 marker genes involving in C-, N- and S-transformation using SPSS Statistics 20 (IBM, USA).  
135 NetworkSpearman graphanalysis was employed to investigate the key functional genes and nutrient  
136 elements of affecting the coupling transformation of C, N and S, the p-values in the correlation were  
137 adjusted statistically significant (PFDR<0.05). Network analysis was carried out by Gephi software  
138 according to the relationships between sediment parameters and functional genes..C, N and S cycles  
139 and coupled pathways were carried out following Auto CAD software.-

140 Stepwise regression models between functional genes and chemical parameters were established  
141 by using SPSS Statistics 20 (IBM, USA). In stepwise regression analysis, environmental parameters,  
142 (i.e. pH, OM, NH<sub>4</sub><sup>+</sup>-N, NO<sub>3</sub><sup>-</sup>-N, NO<sub>2</sub><sup>-</sup>-N, TN, IP, OP and TP) were used as candidate variables to  
143 integrate with functional genes related to C, N and S cycles.

144

## 145 **3 Results**



### 146 3.1 Chemical properties of river sediments

147 Table 1 presented the main chemical properties of 135 sediment samples. The pH values of river  
148 sediments were alkaline (with a mean of 7.78) and exhibited a lower coefficient of variance (CV) in  
149 all of chemical properties detected. TN displayed a higher CV among the different sampling sections  
150 rather than OM and TP. In 135 investigated sections, the content of inorganic nitrogen in  
151 sediments displayed a following order:  $\text{NH}_4^+\text{-N} > \text{NO}_3^-\text{-N} > \text{NO}_2^-\text{-N}$ , and  $\text{NO}_3^-\text{-N}$  contents among  
152 different sections showed the highest CV in inorganic nitrogen. IP content with a lower CV is higher  
153 than OP content in sediments. In five sections (i.e., sections C1, Q2, T3, TA1 and G6) with higher OM,  
154  $\text{NH}_4^+\text{-N}$ , TN and TP, there were three sections (C1, TA1 and G6) locating in the farmland area. The  
155 first branch of the Huaihe River generally exhibited a lower content of nutrients rather than the  
156 secondary branches, especially OM,  $\text{NH}_4^+\text{-N}$ ,  $\text{NO}_3^-\text{-N}$  and TN contents in sediments. Data analysis  
157 presented that OM ( $29.50 \pm 13.98 \text{ g} \cdot \text{kg}^{-1}$ ),  $\text{NH}_4^+\text{-N}$  ( $34.92 \pm 34.33 \text{ mg} \cdot \text{kg}^{-1}$ ),  $\text{NO}_3^-\text{-N}$  ( $7.01 \pm 6.85 \text{ mg} \cdot \text{kg}^{-1}$ )  
158 and TN ( $0.41 \pm 0.34 \text{ g} \cdot \text{kg}^{-1}$ ) in the sediments of Guohe River (a first branch of the Huaihe River) were  
159 significantly lower than those in the sediments of its secondary branches (OM:  $43.54 \pm 21.68 \text{ g} \cdot \text{kg}^{-1}$ ;  
160  $\text{NH}_4^+\text{-N}$ :  $73.45 \pm 58.09 \text{ mg} \cdot \text{kg}^{-1}$ ;  $\text{NO}_3^-\text{-N}$ :  $35.35 \pm 20.01 \text{ mg} \cdot \text{kg}^{-1}$  and TN:  $0.85 \pm 0.66 \text{ g} \cdot \text{kg}^{-1}$ ,  $p < 0.05$ ). The  
161 similar characteristics were found in the Shayinghe River (a first branch of Huaihe River) with the  
162 secondary branches.

163 Data analysis indicated that there was a significantly positive correlation among the different

164 chemical properties except for the pH and NO<sub>2</sub><sup>-</sup>-N (Fig 2). The higher positive correlation between  
165 OM and TN in sediments indicated that both had the same source.

### 166 **3.2 Quantities of functional genes related to C, N and S cycles in river sediments**

167 In 13 functional genes investigated in this study, the abundance of *dsrB* and *pmoA1* genes was  
168 relative higher, and that of *hzo* and *aprA* genes lower (Table 2).

169 For N-cycling genes, the abundance of *amoA*-AOB was substantially lower as compared to  
170 *amoA*-AOA. Comparing to *nirK* and *nosZ*, *nirS* displayed higher abundance. In the functional genes  
171 related to C-cycle, the *mcrA* abundance exhibited the highest coefficient of variance. Table 2 also  
172 demonstrated that in contrast to *pmoA* and *pmoA2* genes, type II methanotrophs possessing the *pmoA1*  
173 gene were predominant. In two genes involving in sulfate reduction, the abundance of *dsrB* gene was  
174 significantly more than that of *aprA* gene in sediments.

175 All of the functional genes investigated in this study displayed higher CV (67.38%-317.86%),  
176 indicating a significant difference in abundance of detected N-, C- and S-cycling genes among 135  
177 river sections.

178 Table 3 displayed the correlation coefficient among 13 functional genes involving in C-, N- and  
179 S-cycle in sediments. In the functional genes involving in N-cycle, abundances of *cmo*, *hzo*,  
180 *amoA*-AOB, *nirS*, *nosZ* genes were correlated betweenwith each other. Meanwhile, abundances of  
181 methanotrophic (*pmoA*, *pmoA1*, *pmoA2*), *mcrA* genes were correlated between each other in C-cycle.

182 With regard to S-functional genes, no direct relationships between *dsrB* and *aprA* were found.

183 Concerning the correlations among N-, C- and S-functional genes, the methanotrophic (*pmoA*,  
184 *pmoA1* and *pmoA2*) genes were correlated with the abundance of *nosZ*. The abundance of *mcrA* gene  
185 had a positive correlation with denitrifying genes (*nirK*, *nirS* and *nosZ*) and *hzo* genes. It was noted  
186 that the *dsrB* and *aprA* gene abundance were positively correlated with *hzo* gene abundance.  
187 Interestingly, positive correlation was also found between the abundance of *aprA* gene and  
188 C-functional genes (*mcrA*, *pmoA*, *pmoA1* and *pmoA2*).

#### 189 **4 Discussions**

190 The cycles of carbon, nitrogen and sulphur in environment are made up of a series of chemical  
191 reactions (Parey et al., 2011;Lammel et al., 2015). For the sediment containing a large amount of  
192 organic matter and being in the state of reduction, the oxidation-reduction reaction should be the most  
193 important chemical reaction (Vincent et al., 2017). The substance of the oxidation-reduction reaction  
194 is the gain or loss of electrons or the offset of share electron pair. In river sediment, some elements get  
195 electrons to be reduced, while other elements lose electrons to be oxidized in the oxidation-reduction  
196 reaction. The enzymes from microorganisms, as catalyzer, can accelerate the oxidation-reduction  
197 reactions in sediment (Kandeler et al., 2006;Rocca et al., 2014;Parey et al., 2011). Although sediment  
198 is an important place of elemental cycles, ecological processes regulating methane, nitrogen and sulfur  
199 cycles are poorly understood.

#### 200 **4.1 Coupling of methane / nitrogen cycles in river sediments**

201 Bai et al. (2013) revealed that the methanogenesis could coexist with anammox in a single  
202 anaerobic reactor. Based on the hypothesis of this research, there was a positive correlation between  
203 the abundance of *hzo* gene and *mcrA* gene, predicting that methanogenesis and anammox could work  
204 together, which also proved that anammox coupled to methanogenesis (Fig 3).

205 Studies showed that coupling the nitrate reduction and anaerobic digestion to form a bioreactor,  
206 in which denitrification and methanogenesis process can be carried out simultaneously. The coupled  
207 process could handle the high-strength carbon- and nitrate-containing wastewater, which had received  
208 extensive attention recently (Chen et al., 2009;Sun et al., 2015;Kodera et al., 2017). Based on our  
209 hypothesis, the abundance of *mcrA* gene was positively correlated with denitrifying genes (*nirK*, *nirS*  
210 and *nosZ*) in this study, which can also speculate that simultaneous denitrification and methanogenesis  
211 (SDM) process might occurred (Fig. 3). The simultaneous removal of carbon and nitrogen in the  
212 anaerobic environment through methanogenesis and denitrification was proved to be achievable (Chen  
213 et al., 2009).

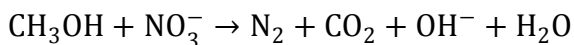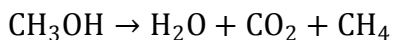

214 Du et al. (2017) confirmed that it existed in reactor that a novel partial-denitrification combined  
215 with anammox process, since the nitrite for anammox could be acquired from partial-denitrification

216 process. In our study, the abundance of *hzo* gene showed positive correlations with the denitrifying  
217 genes (*nirK*, *nirS* and *nosZ*), suggesting that denitrification might cooperate with anammox. Bai et al.  
218 (2013) proposed that an integrated process was developed by an anaerobic reactor, in which  
219 methanogenesis, denitrification and anammox were coupled, with methanogenesis first, then  
220 denitrification and anammox simultaneously. Accordingly, the whole abundance of *mcrA* gene was the  
221 highest compared with denitrifying genes (*nirK*, *nirS* and *nosZ*) and *hzo* gene in this study. Therefore,  
222 we postulated the plausible stoichiometric equations, which were decipied in table S2.

223 Methane oxidation coupled to denitrification consisted of nitrite-driven anaerobic methane  
224 oxidation (Ettwig et al., 2010) and aerobic methane oxidation coupling to denitrification (Zhu et al.,  
225 2016). This research exhibited that methanotrophic (*pmoA*, *pmoA1* and *pmoA2*) genes and *cmo* gene  
226 were positively correlated with denitrifying genes (*nirS* and *nosZ*), which inferred the existence of  
227 aerobic methane oxidation coupled to denitrification (AME-D) process and anaerobic  
228 nitrite-dependent methane oxidation process in river sediments as is hypothesized (Fig 3). According  
229 to the speculation of the electron transfer pathway, since aerobic/anaerobic methane oxidation both are  
230 the processes of releasing electrons, while the released electrons are accepted by denitrification  
231 processes ( $\text{NO}_2^- \rightarrow \text{NO}$  and  $\text{N}_2\text{O} \rightarrow \text{N}_2$ ). To date, the aerobic methane oxidation coupled to  
232 denitrification (AME-D) mechanism still remains obscure, and relevant studies have been carried out  
233 to propose different explanations of AME-D progress (Stein and Klotz, 2011); (Modin et al., 2007).

234 Zhu et al. (2016) summarized the potential energy reactions included in AME-D process. Under  
235 anaerobic conditions,  $\text{NO}_3^-$  and  $\text{NO}_2^-$  played a crucial role in supplying electron acceptors in  
236 denitrification processes (Zhu et al., 2016), a tentative inference about AME-D progress on this result  
237 is depicted in table S2. Ettwig et al. (2010) confirmed the existence of nitrite-driven anaerobic  
238 methane oxidation and explained the source of  $\text{O}_2$  and the production of  $\text{N}_2$ . Dedicated stable isotope  
239 studies showed that this organism could make its own molecular oxygen from nitrite via nitric oxide.  
240 The produced oxygen was mainly used to oxidize methane in an anaerobic environment according to  
241 the expected stoichiometry:

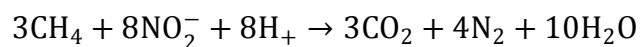

242 In our study, methanotrophic genes (*pmoA*, *pmoA1* and *pmoA2*) were positively correlated with  
243 *amoA*-AOB, which can predict the coupled system of aerobic methane oxidation-aerobic ammonia  
244 oxidation based on the relationship between the functional genes related to C, N cycles (Fig 3).  
245 Some investigators had confirmed that aerobic methanotrophs could oxidize ammonium through  
246 pMMO, since methane monooxygenase (pMMO) and ammonia monooxygenase (AMO) may be  
247 evolutionarily related (Holmes et al., 1995; Klotz and Norton, 1998). The coupled system might be:

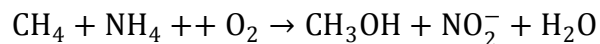

248 Recent study had confirmed the co-occurrence of nitrite-dependent anaerobic ammonium and  
249 methane oxidation processes in subtropical acidic forest soils (Meng et al., 2016). Anammox and

250 nitrite-dependent anaerobic methane oxidation (n-damo) which linked the microbial nitrogen and  
251 carbon cycles are two new processes of recent discoveries (Zhu et al., 2010; Meng et al., 2016). In this  
252 research, the abundance of *cmo* gene had a positive correlation with *hzo*, which also predicted the  
253 coupled system of nitrite-dependent anaerobic ammonium and methane oxidation processes on the  
254 basis of our hypothesis (Fig 3).

#### 255 **4.2 Coupling of nitrogen / sulphur cycles in river sediments**

256 Sulfate-reducing ammonia oxidation (SRAO) could simultaneously remove ammonium and  
257 sulfate in one anaerobic reactor, and several published works verified this process could occur both  
258 in laboratory-scale bioreactors or nature (Fdz-Polanco et al., 2001; Rikmann et al., 2012). Our results  
259 found that the abundance of *hzo* gene had a positive correlation with *dsrB* and *aprA* gene, indicating  
260 the occurrence of sulfate-reducing ammonia oxidation (SRAO) process, which further supports our  
261 hypothesis (Fig. 4).

262 The pathway of sulfites reduced to hydrogen sulfide may be: (1) transforming trithionate and  
263 thiosulfate through three consecutive pairs of electron transfer ( $3\text{SO}_3^{2-} \rightarrow \text{S}_3\text{O}_6^{2-} \rightarrow \text{S}_2\text{O}_3^{2-} \rightarrow \text{S}^{2-}$ ).  
264 (2) losing six electrons directly, and not forming above intermediates, which is called the coordinate 6  
265 electron reaction (Parey et al., 2011). In addition, the process of anammox was responsible for  
266 anaerobic nitrogen removal (Rikmann et al., 2012). At present, the transformation of intermediate  
267 involved in anammox still remains ambiguous and it is reported that the intermediate contained

268 NH<sub>2</sub>OH, N<sub>2</sub>H<sub>4</sub> and HNO<sub>2</sub>, NO and N<sub>2</sub>O, etc. Up to now, many investigations have been focused on the  
269 feasible metabolic pathway and reaction equations of the synchronously ammonia and sulfate removal.  
270 Sulfate-reducing ammonium oxidation (SRAO) process was first proposed to explain “abnormal”  
271 losses of nitrogen and sulfate (Fdz-Polanco et al., 2001).

272 ~~Possibility of SRAO was noted by Strous et al. (2002), Zhang et al. (2009), Schrum et al. (2009)~~

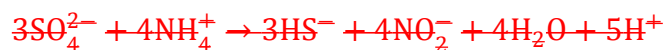

273 Coupled with the process of anammox, summary possible equations of SRAO was noted by

274 Strous et al. (2002), Zhang et al. (2009), Schrum et al. (2009)~~was displayed:~~

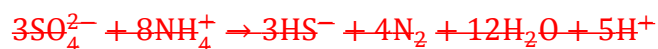

275 In addition to SO<sub>4</sub><sup>2-</sup>, NO<sub>2</sub><sup>-</sup> is the most favourable electron acceptor (Rikmann et al., 2012). The  
276 possible half-reactions for SRAO, as suggested by Yang et al. (2009), would be as follows:

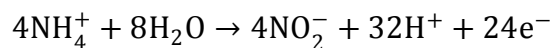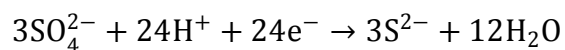

277 Previous research did not clearly indicate the existence of aerobic ammonia oxidation-sulfate  
278 reduction process. In this research, the abundance of *amoA*-AOA gene was positively correlated with  
279 *dsrB* gene, we can speculate the coupled system of aerobic ammonia-sulfate reduction according to  
280 our hypothesis, which might occur through horizontal gene transfer (Fig. 4).

281 Previous studies had confirmed the existence of microaerophilic sulfate and nitrate co-reduction



282 system under laboratory conditions (Bowles et al., 2012; Brunet and Garciagil, 1996). The abundance  
283 of denitrifying genes (*nirS*, *nirK* and *nosZ*) had a positive correlation with *aprA* gene, which also  
284 inferred the co-reduction system based on the assumption of this research (Fig 4). Additionally,  
285 several sulfur-reduced compounds ( $\text{H}_2\text{S}$ ,  $\text{FeS}$  and  $\text{S}_2\text{O}_3^{2-}$ ) could act as electron donors for dissimilatory  
286 nitrate reduction (Brunet and Garciagil, 1996).

### 287 **4.3 Coupling of methane / sulphur cycles in river sediments**

288 There were two methane-oxidizing mechanisms of aerobic and anaerobic/aerobic oxidation in  
289 sediment. For the coupling of C and S, the pathway of sulfate-dependent anaerobic methane oxidation  
290 had also been discovered (M et al., 2003; Xu et al., 2014). In this study, the positive correlation  
291 between *cmo* gene and *aprA* gene could speculate the coupling relation of anaerobic methane  
292 oxidation-sulfate reduction. Similarly, the abundance of methanotrophic genes (*pmoA*, *pmoA1* and  
293 *pmoA2*) were positively correlated with *aprA* gene, which can also infer the occurrence of  
294 sulfate-dependent aerobic methane oxidation process, thereby further supporting the hypothesis (Fig.  
295 5).

296 The coexistence of methanogenesis and sulfate reduction has been shown before (Maltby et al.,  
297 2018). In this research, the positive correlation between *aprA* gene and *mcrA* gene could also deduce  
298 the presence of methanogenesis within the sulfate reduction zone, which further verified the

299 hypothesis that the correlation among functional genes could be used to predict the coupled  
300 systems (Fig 5).

#### 301 **4.4 Linking the abundance of functional genes and environmental parameters**

302 In the methane cycle, the *mcrA* gene (methylcoenzyme M reductase) is exclusively linked to  
303 methanogens. Although previous studies have been performed to identify the main factors controlling  
304 CH<sub>4</sub> dynamics from wetlands, the effect of nutrients on CH<sub>4</sub> dynamics is poorly understood.  
305 Previously studies found that organic matter, nitrogen and phosphorus was the important regulating  
306 factors in the process of methanogenesis (Yang, 1998). In our study, correlation analysis indicated that  
307 the content of OM, NH<sub>4</sub><sup>+</sup>-N, NO<sub>3</sub><sup>-</sup>, TN and OP had significantly positive correlation with the  
308 abundances of methanogenic (*mcrA*) gene (Fig 6). And, the stepwise regression presented a following  
309 regression:  $\log mcrA = 6.359 + 0.006 * NH_4^+ - N + 0.5 * TN - 0.001 * TP + 0.325 * pH$  ( $R^2 = 0.49$ ,  
310  $P < 0.001$ ), which indicated that N had a greater effect on *mcrA* than C and P. The abundance of  
311 methanotrophic genes (*pmoA*, *pmoA1* and *pmoA2*) and *cmo* gene were positively influenced by OM,  
312 NH<sub>4</sub><sup>+</sup>-N, NO<sub>3</sub><sup>-</sup>, TN (Fig. 6), suggesting that C and N co-limitation of the methanotrophs.

313 In the process of ammonia oxidation, studies indicated that the *amoA*-AOB was generally more  
314 sensitive to higher OM and NH<sub>4</sub><sup>+</sup> concentrations (Lammel et al., 2015; Stempfhuber et al., 2014). From  
315 Fig 6, it could be seen that both of OM and NH<sub>4</sub><sup>+</sup>-N contributed to the increase of the abundance of  
316 AOB and the correlation coefficient between *amoA*-AOB and OM and between *amoA*-AOB and

317  $\text{NH}_4^+\text{-N}$  was ( $r=0.424$ ,  $p<0.01$ ) and ( $r=0.459$ ,  $p<0.01$ ), respectively.

318 The *hzo* gene involving in the anaerobic ammonia oxidation (anammox,  $\text{NH}_4^++\text{NO}_3^-\rightarrow\text{H}_2\text{O}+\text{N}_2$ )  
319 process (Schmid et al., 2010) mainly mediated by anammox bacteria and was shaped by various  
320 environmental factors in natural habitats (Bai et al., 2015). The abundance of *hzo* gene was mainly  
321 related to the contents of OM,  $\text{NH}_4^+$ ,  $\text{NO}_3^-$ , TN in this study (Fig 6).

322 In this study, all of the denitrifying genes (*nirK*, *nirS* and *nosZ*) was positively correlated with  
323 OM,  $\text{NH}_4^+\text{-N}$ ,  $\text{NO}_3^-\text{-N}$ , TN and OP (Fig 6), which implied that the lower content of nitrogen in  
324 sediments was disadvantageous for denitrification in river sediments.

325 The *aprA* gene and *dsrB* gene could serve as marker genes for sulfate reduction energy  
326 metabolism (Bae et al., 2015; Meyer and Kuever, 2007). We found that the abundance of *aprA* gene  
327 was positively correlated with OM,  $\text{NH}_4^+\text{-N}$ ,  $\text{NO}_3^-\text{-N}$ , TN, and OP, but no direct correlations between  
328 the *dsrB* copy numbers and any nutrient characteristics of the Huaihe river sediment were detected.  
329 This result is different from study of (Bae et al., 2015), who presented that there was a positive  
330 correlation between *dsrB* gene and TP concentrations.

331 Integrating the gene abundance data with environmental parameters provided a comprehensive  
332 overview of these interactions related to nitrogen, methane and sulphur cycle, which showed that  
333 among the nutrient characteristics of Huaihe River sediment, organic matter and nitrogen nutrients had  
334 comprehensive and complicate impact on the coupling transformational processes of C, N and S in

335 river sediment (Fig 6).

336 Network graph also showed that *amoA*-AOA and *dsrB* played a secondary role in the coupling  
337 transformation of C, N and S, while *aprA*, *mcrA* and *hzo* closely participate in the coupling processes  
338 (Fig 6). There was a positive correlation between the abundance of *dsrB* gene and *amoA*-AOA gene,  
339 but *dsrB* gene was not related to *amoA*-AOB gene. It indicated that *amoA*-AOA gene had an important  
340 effect on the coupling process of ammonia oxidation and sulfite reduction. Similarly, in ammonia  
341 oxidation genes (*amoA*-AOA and *amoA*-AOB), *aprA* gene only had a positive correlation with  
342 *amoA*-AOB gene, which suggested that *amoA*-AOB gene played a key role in the coupling process of  
343 ammonia oxidation and sulfate reduction. Network graph displayed that *aprA* gene played a more  
344 important role than *dsrB* gene in the coupling of N-S and C-S, indicating that the process of sulfite  
345 reduction might occur toughly.

346 In addition, network graph showed that the *nirS* gene exhibited a greater weight than the *nirK*  
347 gene, indicating that *nirS*-encoding bacteria may take precedence over *nirK*-encoding bacteria in river  
348 sediments investigated in the coupling processes of N-C and N-S. Enwall et al. (2010) held that  
349 different habitat and nutrient content resulted in the differences in abundance of the *nirS*- and  
350 *nirK*-type denitrifiers. Kim et al. (2011) also suggested that both types of denitrifiers apparently  
351 occupy different ecological niches.

352

## 353 5 Conclusions

354 Appropriate marker genes abundance can determine quantification of microbial functional groups.

355 A direct relationship was established between the nutritional status and the distributions of functional

356 genes. The C-N, C-S and N-S coupled systems might be inferred in this research based on the

357 correlation among functional genes. Compared with other genes, the *amoA*-AOA and *dsrB* played

358 a minor role in the coupling transformation of C, N and S, while S-functional gene (*aprA*),

359 C-functional gene (*mcrA*), N-functional gene (*hzo*) were the key functional genes that participate in

360 the coupled processes in the elemental biogeochemical cycle. Despite the fact that this hypothesis still

361 has to be verified experimentally it is safe to conclude that the abundance of functional genes involved

362 in C, N and S cycles were mainly influenced by OM, NH<sub>4</sub><sup>+</sup>-N, NO<sub>3</sub><sup>-</sup>-N, and TN contents, indicating

363 that organic matter and nitrogen nutrients might play an important modulating role in the coupling of

364 carbon, nitrogen and sulphur.~~Despite the fact that this hypothesis still has to be verified~~

365 ~~experimentally it is safe to conclude that C and N might play an important modulating role in the~~

366 ~~coupling of carbon, nitrogen and sulphur.~~ Transcription and protein group can be carried out to further

367 verify if the processes exactly occurred.

368

## 369 Author contributions

370 MZZ, YL, and QYS proposed and organized the overall project. MZZ performed the majority of

371 the experiments. PXC and XHW gave assistance in sampling and the analyses of chemical properties.  
372 MZZ and QYS wrote the main manuscript text. YL contributed insightful discussions. All authors  
373 reviewed the manuscript.

374

### 375 **Funding**

376 Financial supports from the National Science and Technology Major Project  
377 (2012ZX07204-004).

378

### 379 **Compliance with ethical standards**

380 The work has not been published previously and not under consideration for publication  
381 elsewhere. This article does not contain any studies with human participants or animals performed by  
382 any of the authors.

383

### 384 **References**

385 Aufdenkampe, A. K., Mayorga, E., Raymond, P. A., Melack, J. M., Doney, S. C., Alin, S. R., Aalto, R.  
386 E., and Yoo, K.: Riverine coupling of biogeochemical cycles between land, oceans, and atmosphere,  
387 *Frontiers in Ecology & the Environment*, 9, 53-60, 2011.

388 Bae, H. S., Holmes, M. E., Chanton, J. P., Reddy, K. R., and Ogram, A.: Distribution, Activities, and

389 Interactions of Methanogens and Sulfate-Reducing Prokaryotes in the Florida Everglades, *Applied &*  
390 *Environmental Microbiology*, 81, 7431, 2015.

391 Bai, C., Zhang, D., He, Q., Lu, P., and Ai, H.: An EGSB-SBR based process for coupling  
392 methanogenesis and shortcut nitrogen removal, *Water Science & Technology A Journal of the*  
393 *International Association on Water Pollution Research*, 68, 1633, 2013.

394 Bai, R., Xi, D., He, J. Z., Hu, H. W., Fang, Y. T., and Zhang, L. M.: Activity, abundance and  
395 community structure of anammox bacteria along depth profiles in three different paddy soils, *Soil*  
396 *Biology & Biochemistry*, 91, 212-221, 2015.

397 Bowles, M. W., Nigro, L. M., Teske, A. P., and Joye, S. B.: Denitrification and environmental factors  
398 influencing nitrate removal in Guaymas Basin hydrothermally altered sediments, *Frontiers in*  
399 *Microbiology*, 3, 377, 2012.

400 Bru, D., Ramette, A., Saby, N. P. A., Dequiedt, S., Ranjard, L., Jolivet, C., Arrouays, D., and Philippot,  
401 L.: Determinants of the distribution of nitrogen-cycling microbial communities at the landscape scale,  
402 *ISME J*, 5, 532-542, <http://www.nature.com/ismej/journal/v5/n3/supinfo/ismej2010130s1.html>, 2011.

403 Brunet, R. C., and Garcagiil, L. J.: Sulfide-induced dissimilatory nitrate reduction to ammonia in  
404 anaerobic freshwater sediments, *Fems Microbiology Ecology*, 21, 131-138, 1996.

405 Chen, S., Sun, D., and Chung, J. S.: Simultaneous methanogenesis and denitrification of aniline  
406 wastewater by using anaerobic-aerobic biofilm system with recirculation, *Journal of Hazardous*

407 Materials, 169, 575, 2009.

408 Cheng, W., Zhang, J., Wang, Z., Wang, M., and Xie, S.: Bacterial communities in sediments of a  
409 drinking water reservoir, *Annals of Microbiology*, 64, 875-878, 2014.

410 Crump, B. C., Peterson, B. J., Raymond, P. A., Amon, R. M. W., Rinehart, A., Mcclelland, J. W., and  
411 Holmes, R. M.: Circumpolar synchrony in big river bacterioplankton, *Proceedings of the National  
412 Academy of Sciences of the United States of America*, 106, 21208-21212, 2009.

413 Du, R., Cao, S., Niu, M., Li, B., Wang, S., and Peng, Y.: Performance of partial-denitrification process  
414 providing nitrite for anammox in sequencing batch reactor (SBR) and upflow sludge blanket (USB)  
415 reactor, *International Biodeterioration & Biodegradation*, 122, 38-46,  
416 <https://doi.org/10.1016/j.ibiod.2017.04.018>, 2017.

417 Emil, R. S., Hanna, K., Gunter, W., Christian, L., Alban, R., Johanna, W., Katrin, K., and Miriam, W.:  
418 Methane Seep in Shallow-Water Permeable Sediment Harbors High Diversity of Anaerobic  
419 Methanotrophic Communities, Elba, Italy, *Frontiers in Microbiology*, 7, 374, 2016.

420 Enwall, K., Stenberg, M., and Hallin, S.: Soil resources influence spatial patterns of denitrifying  
421 communities at scales compatible with land management, *Applied & Environmental Microbiology*, 76,  
422 2243-2250, 2010.

423 Ettwig, K. F., Butler, M. K., Le, P. D., Pelletier, E., Mangenot, S., Kuypers, M. M., Schreiber, F.,  
424 Dutilh, B. E., Zedelius, J., and De, B. D.: Nitrite-driven anaerobic methane oxidation by oxygenic



425 bacteria, *Nature*, 464, 543, 2010.

426 Fdz-Polanco, F., Fdz-Polanco, M., Fernández, N., Urueña, García, P. A., and Villaverde, S.:  
427 Combining the biological nitrogen and sulfur cycles in anaerobic conditions, *Water Science &*  
428 *Technology A Journal of the International Association on Water Pollution Research*, 44, 77-84, 2001.

429 Fonti, V., Beolchini, F., Rocchetti, L., and Dell'Anno, A.: Bioremediation of contaminated marine  
430 sediments can enhance metal mobility due to changes of bacterial diversity, *Water Research*, 68,  
431 637-650, 2015.

432 He, Y., Ye, J., and Yang, X.: Analysis of the spatio-temporal patterns of dry and wet conditions in the  
433 Huai River Basin using the standardized precipitation index, *Atmospheric Research*, 166, 120-128,  
434 2015.

435 Holmes, A. J., Costello, A., Lidstrom, M. E., and Murrell, J. C.: Evidence that participate methane  
436 monooxygenase and ammonia monooxygenase may be evolutionarily related, *Fems Microbiology*  
437 *Letters*, 132, 203–208, 1995.

438 Jiang, Y.: GIS Stream Network Analysis for Huaihe River Basin of China, *Procedia Environmental*  
439 *Sciences*, 10, 1553-1558, 2011.

440 Kandeler, E., Deiglmayr, K., Tscherko, D., Bru, D., and Philippot, L.: Abundance of narG, nirS, nirK,  
441 and nosZ Genes of Denitrifying Bacteria during Primary Successions of a Glacier Foreland, *Applied*  
442 *& Environmental Microbiology*, 72, 5957-5962, 2006.

443 Kim, O. S., Imhoff, J. F., Witzel, K. P., and Junier, P.: Distribution of denitrifying bacterial  
444 communities in the stratified water column and sediment–water interface in two freshwater lakes and  
445 the Baltic Sea, *Aquatic Ecology*, 45, 99-112, 2011.

446 Klotz, M. G., and Norton, J. M.: Multiple copies of ammonia monooxygenase (amo) operons have  
447 evolved under biased AT/GC mutational pressure in ammonia-oxidizing autotrophic bacteria, *Fems*  
448 *Microbiology Letters*, 168, 303-311, 1998.

449 Knittel, K., and Boetius, A.: Anaerobic oxidation of methane: progress with an unknown process,  
450 *Annual Review of Microbiology*, 63, 311, 2008.

451 Kodera, T., Akizuki, S., and Toda, T.: Formation of simultaneous denitrification and methanogenesis  
452 granules in biological wastewater treatment, *Process Biochemistry*, 2017.

453 Lammel, D. R., Feigl, B. J., Cerri, C. C., and Nüsslein, K.: Specific microbial gene abundances and  
454 soil parameters contribute to C, N, and greenhouse gas process rates after land use change in Southern  
455 Amazonian Soils, *Frontiers in Microbiology*, 6, 10.3389/fmicb.2015.01057, 2015.

456 Larmola, T., Leppänen, S. M., Tuittila, E. S., Aarva, M., Merilä, P., Fritze, H., and Tirola, M.:  
457 Methanotrophy induces nitrogen fixation during peatland development, *Proceedings of the National*  
458 *Academy of Sciences of the United States of America*, 111, 734-739, 2014.

459 Liu, Y., Zhang, J., Zhao, L., Zhang, X., and Xie, S.: Spatial distribution of bacterial communities in  
460 high-altitude freshwater wetland sediment, *Limnology*, 15, 249-256, 2014.

461 Long, Y., Jiang, X., Guo, Q., Li, B., and Xie, S.: Sediment nitrite-dependent methane-oxidizing  
462 microorganisms temporally and spatially shift in the Dongjiang River, *Applied Microbiology &*  
463 *Biotechnology*, 101, 1-10, 2016.

464 Long, Y., Liu, C., Lin, H., Li, N., Guo, Q., and Xie, S.: Vertical and horizontal distribution of sediment  
465 nitrite-dependent methane-oxidizing organisms in a mesotrophic freshwater reservoir, *Canadian*  
466 *Journal of Microbiology*, 63, 525, 2017.

467 Luo, J. H., Chen, H., Yuan, Z., and Guo, J.: Methane-supported nitrate removal from groundwater in a  
468 membrane biofilm reactor, *Water Research*, 132, 71-78, 2017.

469 M, K., A, M., FO, G., R, A., F, W., M, K., R, R., J, K., R, B., and RK, T.: A conspicuous nickel protein  
470 in microbial mats that oxidize methane anaerobically, *Nature*, 426, 878-881, 2003.

471 Maltby, J., Steinle, L., Löscher, C. R., Bange, H. W., Fischer, M. A., Schmidt, M., and Treude, T.:  
472 Microbial methanogenesis in the sulfate-reducing zone of sediments in the Eckernförde Bay, SW  
473 Baltic Sea, *Biogeosciences*, 15, 137-157, 2018.

474 Meng, H., Wang, Y. F., Chan, H. W., Wu, R. N., and Gu, J. D.: Co-occurrence of nitrite-dependent  
475 anaerobic ammonium and methane oxidation processes in subtropical acidic forest soils, *Applied*  
476 *Microbiology & Biotechnology*, 100, 7727-7739, 2016.

477 Meng, J., Wang, T., Wang, P., Giesy, J. P., and Lu, Y.: Perfluoroalkyl substances and organochlorine  
478 pesticides in sediments from Huaihe watershed in China, *Journal of Environmental Sciences*, 26,

479 2198–2206, 2014.

480 Meyer, B., and Kuever, J.: Molecular Analysis of the Diversity of Sulfate-Reducing and  
481 Sulfur-Oxidizing Prokaryotes in the Environment, Using *aprA* as Functional Marker Gene, *Applied &*  
482 *Environmental Microbiology*, 73, 7664, 2007.

483 Modin, O., Fukushi, K., and Yamamoto, K.: Denitrification with methane as external carbon source,  
484 *Water Research*, 41, 2726-2738, 2007.

485 Modin, O., Fukushi, K., Nakajima, F., and Yamamoto, K.: Performance of a membrane biofilm reactor  
486 for denitrification with methane, *Bioresource Technology*, 99, 8054-8060, 2008.

487 Parey, K., Schiffer, A., Steuber, J., Fritz, G., Ermler, U., and Kroneck, P. M.: Dissimilatory Sulfite  
488 Reductase, *Encyclopedia of Inorganic & Bioinorganic Chemistry*, 2011.

489 Petersen, D. G., Blazewicz, S. J., Firestone, M., Herman, D. J., Turetsky, M., and Waldrop, M.:  
490 Abundance of microbial genes associated with nitrogen cycling as indices of biogeochemical process  
491 rates across a vegetation gradient in Alaska, *Environmental Microbiology*, 14, 993-1008, 2012.

492 Rikmann, E., Zekker, I., Tomingas, M., Tenno, T., Menert, A., Loorits, L., and Tenno, T.:  
493 Sulfate-reducing anaerobic ammonium oxidation as a potential treatment method for high  
494 nitrogen-content wastewater, *Biodegradation*, 23, 509, 2012.

495 Rocca, J. D., Hall, E. K., Lennon, J. T., Evans, S. E., Waldrop, M. P., Cotner, J. B., Nemergut, D. R.,  
496 Graham, E. B., and Wallenstein, M. D.: Relationships between protein-encoding gene abundance and

497 corresponding process are commonly assumed yet rarely observed, *Isme Journal*, 9, 1693, 2014.

498 Ruban, V., López-Sánchez, J. F., Pardo, P., Rauret, G., Muntau, H., and Quevauviller, P.: Harmonized  
499 protocol and certified reference material for the determination of extractable contents of phosphorus in  
500 freshwater sediments--a synthesis of recent works, *Analytical and Bioanalytical Chemistry*, 370,  
501 224-228, 2001.

502 Schmid, M. C., Hooper, A. B., Klotz, M. G., Wobken, D., Lam, P., Kuypers, M. M.,  
503 Pommereningroeser, A., Hj, O. D. C., and Jetten, M. S.: Environmental detection of octahaem  
504 cytochrome c hydroxylamine/hydrazine oxidoreductase genes of aerobic and anaerobic  
505 ammonium-oxidizing bacteria, *Environmental Microbiology*, 10, 3140-3149, 2010.

506 Schrum, H. N., Spivack, A. J., Kastner, M., and D'Hondt, S. L.: Sulfate-Reducing Ammonium  
507 Oxidation: A Thermodynamically Feasible Metabolic Pathway in Subseafloor Sediment, *Geology*, 37,  
508 939-942, 2009.

509 Smith, J. M., Mosier, A. C., and Francis, C. A.: Spatiotemporal Relationships Between the Abundance,  
510 Distribution, and Potential Activities of Ammonia-Oxidizing and Denitrifying Microorganisms in  
511 Intertidal Sediments, *Microbial Ecology*, 69, 13-24, 2015.

512 Stein, L. Y., and Klotz, M. G.: Nitrifying and denitrifying pathways of methanotrophic bacteria,  
513 *Biochem Soc Trans*, 39, 1826-1831, 2011.

514 Stempfhuber, B., Welzl, G., Wubet, T., Schöning, I., Marhan, S., Buscot, F., Kandeler, E., and Schloter,

515 M.: Drivers for ammonia-oxidation along a land-use gradient in grassland soils, *Soil Biology &*  
516 *Biochemistry*, 69, 179-186, 2014.

517 Strous, M., Kuenen, J. G., Fuerst, J. A., Wagner, M., and Jetten, M. S.: The anammox case-a new  
518 experimental manifesto for microbiological eco-physiology, *Antonie Van Leeuwenhoek*, 81, 693-702,  
519 2002.

520 Sun, H., Peng, Y., and Shi, X.: Advanced treatment of landfill leachate using anaerobic-aerobic  
521 process: organic removal by simultaneous denitrification and methanogenesis and nitrogen removal via  
522 nitrite, *Bioresource Technology*, 177, 337, 2015.

523 Tian, D., Zheng, W., Wei, X., Sun, X., Liu, L., Chen, X., Zhang, H., Zhou, Y., Chen, H., and Zhang, H.:  
524 Dissolved microcystins in surface and ground waters in regions with high cancer incidence in the Huai  
525 River Basin of China, *Chemosphere*, 91, 1064-1071, 2013.

526 Vincent, S. G. T., Reshmi, R. R., Hassan, S. J., Nair, K. D., and Varma, A.: Predominant terminal  
527 electron accepting processes during organic matter degradation: Spatio-temporal changes in  
528 Ashtamudi estuary, Kerala, India, *Estuarine Coastal & Shelf Science*, 2017.

529 Wang, J., Gong, B., Huang, W., Wang, Y., and Zhou, J.: Bacterial community structure in simultaneous  
530 nitrification, denitrification and organic matter removal process treating saline mustard tuber  
531 wastewater as revealed by 16S rRNA sequencing, *Bioresource Technology*, 228, 31-38,  
532 <https://doi.org/10.1016/j.biortech.2016.12.071>, 2017.

533 Wang, J. Z., Chen, T. H., Zhu, C. Z., and Peng, S. C.: Trace organic pollutants in sediments from  
534 Huaihe River, China: Evaluation of sources and ecological risk, *Journal of Hydrology*, 512, 463-469,  
535 2014.

536 Weber, H. S., Habicht, K. S., and Thamdrup, B.: Anaerobic Methanotrophic Archaea of the ANME-2d  
537 Cluster Are Active in a Low-sulfate, Iron-rich Freshwater Sediment, *Frontiers in Microbiology*, 8, 619,  
538 2017.

539 Williamson, C. E., Dodds, W., Kratz, T. K., and Palmer, M. A.: Lakes and streams as sentinels of  
540 environmental change in terrestrial atmospheric processes, *Frontiers in Ecology & the Environment*, 6,  
541 247-254, 2008.

542 Xie, Z., Roux, X. L., Wang, C., Gu, Z., An, M., Nan, H., Chen, B., Li, F., Liu, Y., and Du, G.:  
543 Identifying response groups of soil nitrifiers and denitrifiers to grazing and associated soil  
544 environmental drivers in Tibetan alpine meadows, *Soil Biology & Biochemistry*, 77, 89-99, 2014.

545 Xu, X. M., Fu, S. Y., Zhu, Q., Xiao, X., Yuan, J. P., Peng, J., Wu, C. F., and Wang, J. H.: Depth-related  
546 coupling relation between methane-oxidizing bacteria (MOBs) and sulfate-reducing bacteria (SRBs)  
547 in a marine sediment core from the Dongsha region, the South China Sea, *Applied Microbiology &*  
548 *Biotechnology*, 98, 10223-10230, 2014.

549 Yang, S. S.: Methane Production in River and Lake Sediments in Taiwan, *Environmental*  
550 *Geochemistry and Health*, 20, 245-249, 1998.

551 Yang, Z., Zhou, S., and Sun, Y.: Start-up of simultaneous removal of ammonium and sulfate from an  
552 anaerobic ammonium oxidation (anammox) process in an anaerobic up-flow bioreactor, *Journal of*  
553 *Hazardous Materials*, 169, 113-118, 2009.

554 Zhang, L., Zheng, P., He, Y. H., and Jin, R. C.: Performance of sulfate-dependent anaerobic  
555 ammonium oxidation, *Science China Chemistry*, 52, 86-92, 2009.

556 Zhang, M., Yi, L., Lin, L. A., Lin, X., Hetharua, B., Zhao, W., Zhou, M., Zhan, Q., Hong, X., and  
557 Zheng, T.: Molecular and stable isotopic evidence for the occurrence of nitrite-dependent anaerobic  
558 methane-oxidizing bacteria in the mangrove sediment of Zhangjiang Estuary, China, *Applied*  
559 *Microbiology & Biotechnology*, 102, 2441-2454, 2018.

560 Zhang, W., Pan, S., Cao, L., Cai, X., Zhang, K., Xu, Y., and Xu, W.: Changes in extreme climate  
561 events in eastern China during 1960–2013: A case study of the Huaihe River Basin, *Quaternary*  
562 *International*, 380, 22-34, 2015.

563 Zhi, W., and Ji, G.: Quantitative response relationships between nitrogen transformation rates and  
564 nitrogen functional genes in a tidal flow constructed wetland under C/N ratio constraints, *Water*  
565 *Research*, 64, 32-41, 2014.

566 Zhu, G., Jetten, M. S., Kusch, P., Ettwig, K. F., and Yin, C.: Potential roles of anaerobic ammonium  
567 and methane oxidation in the nitrogen cycle of wetland ecosystems, *Applied Microbiology &*  
568 *Biotechnology*, 86, 1043-1055, 2010.



569 Zhu, J., Wang, Q., Yuan, M., Tan, G. A., Sun, F., Wang, C., Wu, W., and Lee, P. H.: Microbiology and  
 570 potential applications of aerobic methane oxidation coupled to denitrification (AME-D) process: A  
 571 review, *Water Research*, 90, 203, 2016.

572  
 573  
 574  
 575  
 576  
 577  
 578  
 579  
 580  
 581  
 582  
 583

**Table 1.** The chemical properties of sediment samples

| Indices            | pH   | OM<br>g·kg <sup>-1</sup> | NH <sub>4</sub> <sup>+</sup> -N<br>mg·kg <sup>-1</sup> | NO <sub>3</sub> <sup>-</sup> -N<br>mg·kg <sup>-1</sup> | NO <sub>2</sub> <sup>-</sup> -N<br>mg·kg <sup>-1</sup> | TN<br>g·kg <sup>-1</sup> | IP<br>mg·kg <sup>-1</sup> | OP<br>mg·kg <sup>-1</sup> | TP<br>mg·kg <sup>-1</sup> | C/N ratio |
|--------------------|------|--------------------------|--------------------------------------------------------|--------------------------------------------------------|--------------------------------------------------------|--------------------------|---------------------------|---------------------------|---------------------------|-----------|
| Mean               | 7.78 | 38.45                    | 62.40                                                  | 22.04                                                  | 0.24                                                   | 0.87                     | 470.93                    | 85.82                     | 674.52                    | 79.12     |
| Median             | 7.80 | 34.66                    | 44.21                                                  | 12.62                                                  | 0.15                                                   | 0.69                     | 448.72                    | 73.94                     | 644.56                    | 52.17     |
| Minimum            | 6.08 | 10.31                    | 2.87                                                   | 0.10                                                   | 0.01                                                   | 0.01                     | 92.93                     | 2.16                      | 152.65                    | 21.17     |
| Maximum            | 8.83 | 173.09                   | 304.46                                                 | 157.48                                                 | 1.40                                                   | 4.77                     | 1631.96                   | 509.17                    | 2108.46                   | 1184.45   |
| CV(%) <sup>*</sup> | 5.44 | 56.75                    | 86.91                                                  | 124.30                                                 | 94.93                                                  | 85.17                    | 39.96                     | 65.88                     | 39.05                     | 145.03    |

584 Notes: CV—coefficient of variance.

585  
 586

**Table 2.** The abundance of functional genes (copies·g<sup>-1</sup> dw soil) related to C, N, S cycles

| Functional genes | Mean                 | CV%    | Minimum              | Maximum               |
|------------------|----------------------|--------|----------------------|-----------------------|
| <i>nirK</i>      | 1.27×10 <sup>8</sup> | 128.94 | 2.17×10 <sup>6</sup> | 9.00×10 <sup>8</sup>  |
| <i>nirS</i>      | 1.55×10 <sup>9</sup> | 163.00 | 6.63×10 <sup>6</sup> | 1.54×10 <sup>10</sup> |
| <i>nosZ</i>      | 1.44×10 <sup>8</sup> | 193.50 | 3.30×10 <sup>5</sup> | 1.73×10 <sup>9</sup>  |
| <i>hzo</i>       | 1.28×10 <sup>6</sup> | 126.67 | 3.33×10 <sup>4</sup> | 1.13×10 <sup>7</sup>  |
| <i>amoA</i> -AOA | 7.76×10 <sup>7</sup> | 317.86 | 1.16×10 <sup>6</sup> | 2.43×10 <sup>9</sup>  |

|                  |                       |        |                      |                       |
|------------------|-----------------------|--------|----------------------|-----------------------|
| <i>amoA</i> -AOB | 1.25×10 <sup>7</sup>  | 67.38  | 2.32×10 <sup>6</sup> | 6.5×10 <sup>7</sup>   |
| <i>mcrA</i>      | 7.76×10 <sup>7</sup>  | 315.34 | 4.31×10 <sup>7</sup> | 2.15×10 <sup>11</sup> |
| <i>pmoA</i>      | 1.32×10 <sup>9</sup>  | 248.39 | 3.38×10 <sup>6</sup> | 2.58×10 <sup>10</sup> |
| <i>pmoA1</i>     | 1.82×10 <sup>10</sup> | 210.38 | 9.88×10 <sup>6</sup> | 2.08×10 <sup>11</sup> |
| <i>pmoA2</i>     | 5.06×10 <sup>8</sup>  | 225.95 | 5.29×10 <sup>6</sup> | 6.18×10 <sup>9</sup>  |
| <i>cmo</i>       | 1.18×10 <sup>8</sup>  | 91.29  | 4.15×10 <sup>6</sup> | 7.45×10 <sup>8</sup>  |
| <i>dsrB</i>      | 7.82×10 <sup>9</sup>  | 146.30 | 1.92×10 <sup>8</sup> | 5.80×10 <sup>10</sup> |
| <i>aprA</i>      | 6.62×10 <sup>6</sup>  | 205.35 | 8.62×10 <sup>3</sup> | 1.09×10 <sup>8</sup>  |

587 Notes: CV—coefficient of variance. Denitrification, including *nirS* and *nirK* for nitrite reductase, and *nosZ* for  
588 nitrous oxide reductase; Anammox, including *hzo* for hydrazine oxidoreductase; Nitrification, including *amoA*  
589 encoding bacterial and archaeal ammonia monooxygenase; Methanogenesis, including *mcrA* for the methyl  
590 coenzyme M reductase; Aerobic methane oxidation, including *pmoA* encoding the alpha-subunit of pMMO, in which  
591 *pmoA* gene from conventional type I methanotrophs, conventional type II methanotrophs and type II methanotrophs  
592 possessing the *pmoA2* gene. Anaerobic nitrite-dependent methane oxidation, including *cmo* gene for *M. oxyfera*  
593 specific primers; Sulfur reduction, including *dsrB* for dissimilatory sulfite reductase and *aprA* for  
594 adenosine-5'-phosphosulfate (APS) reductase.

595 **Table 3.** The correlation coefficient among the abundance of 13 functional genes (n=135)

| Items        | <i>hzo</i> | <i>cmo</i> | <i>AOA</i> | <i>AOB</i> | <i>nirK</i> | <i>nirS</i> | <i>nosZ</i> | <i>mcrA</i> | <i>pmoA</i> | <i>pmoA1</i> | <i>pmoA2</i> | <i>dsrB</i> |
|--------------|------------|------------|------------|------------|-------------|-------------|-------------|-------------|-------------|--------------|--------------|-------------|
| <i>cmo</i>   | 0.763**    |            |            |            |             |             |             |             |             |              |              |             |
| <i>AOA</i>   | 0.042      | -0.04      |            |            |             |             |             |             |             |              |              |             |
| <i>AOB</i>   | 0.492**    | 0.575**    | 0.361**    |            |             |             |             |             |             |              |              |             |
| <i>nirK</i>  | 0.294**    | 0.462**    | -0.161     | 0.159      |             |             |             |             |             |              |              |             |
| <i>nirS</i>  | 0.366**    | 0.617**    | -0.188*    | 0.253**    | 0.810**     |             |             |             |             |              |              |             |
| <i>nosZ</i>  | 0.251**    | 0.534**    | -0.069     | 0.394**    | 0.483**     | 0.550**     |             |             |             |              |              |             |
| <i>mcrA</i>  | 0.515**    | 0.677**    | 0.210*     | 0.501**    | 0.259**     | 0.357**     | 0.444**     |             |             |              |              |             |
| <i>pmoA</i>  | 0.503**    | 0.510**    | 0.142      | 0.308**    | 0.135       | 0.260**     | 0.316**     | 0.594**     |             |              |              |             |
| <i>pmoA1</i> | 0.566**    | 0.788**    | -0.107     | 0.503**    | 0.414**     | 0.586**     | 0.540**     | 0.481**     | 0.402**     |              |              |             |

|              |         |         |         |         |         |         |         |         |         |         |         |        |
|--------------|---------|---------|---------|---------|---------|---------|---------|---------|---------|---------|---------|--------|
| <i>pmoA2</i> | 0.565** | 0.766** | -0.138  | 0.373** | 0.429** | 0.599** | 0.476** | 0.525** | 0.457** | 0.874** |         |        |
| <i>dsrB</i>  | 0.247** | 0.021   | 0.294** | 0.151   | -0.088  | -0.121  | -0.14   | 0.123   | 0.102   | -0.078  | -0.051  |        |
| <i>aprA</i>  | 0.324** | 0.497** | -0.005  | 0.334** | 0.373** | 0.440** | 0.342** | 0.323** | 0.246** | 0.450** | 0.408** | -0.103 |

596

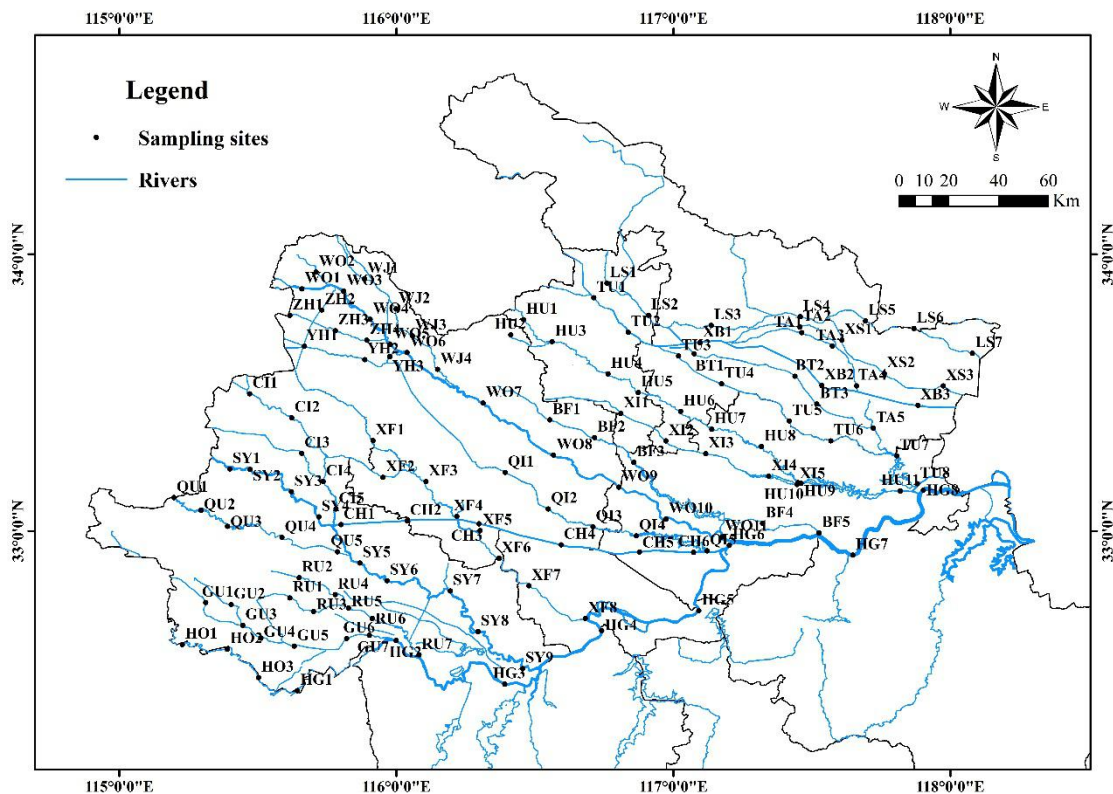

597

598 **Fig.1.** Sketch map of sampling sites of rivers in northern Anhui province

599 Z-Zhaohe River, Y-Youhe River, XS-Xinhe River, X-Xiehe River, XF-Xifeihe River, WJ-Wujiahe  
600 River, W-Guohe River, T-Tuohe River, TA-Tanghe River, S-Shayinghe River, R-Runhe River,  
601 Q-Quanhe River, QI-Qianhe River, L-Suihe River, H-Huihe River, HG-Huaigan river, HO-Honghe  
602 River, G-Guhe River, CH-Cihuai River, C-Cihe River, XB-Bianhe River, BT-Beituohe River,  
603 BF-Beihe River.

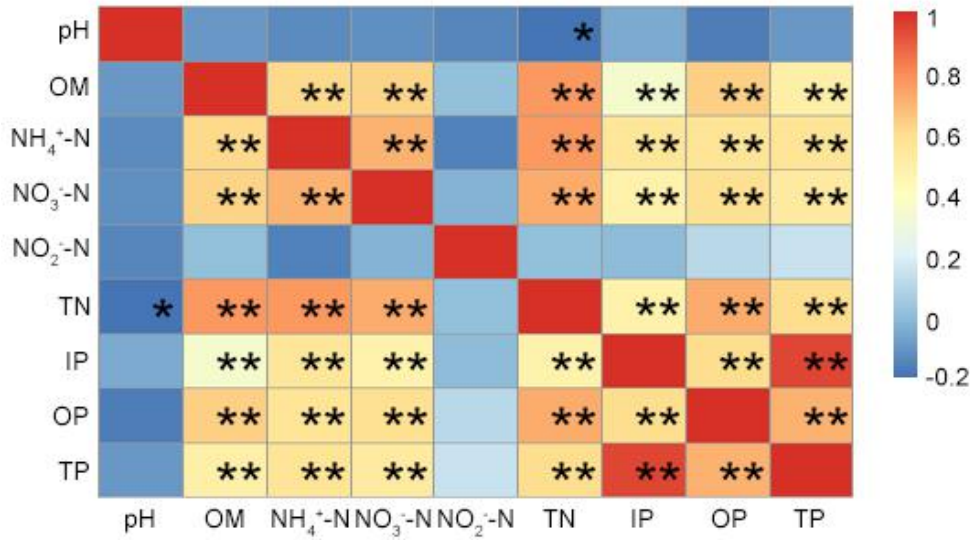

604

605

**Fig.2.** The correlation analysis among different chemical properties

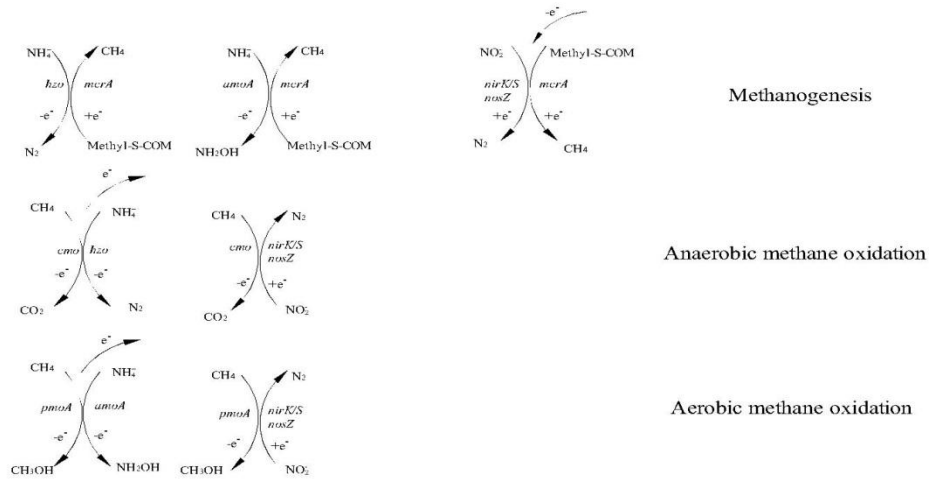

606

607

608

609

**Fig.3.** Coupling of methane / nitrogen cycles in river sediments

610

611

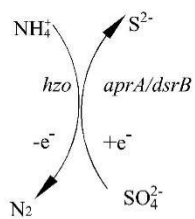

Anammox-Sulfate reduction

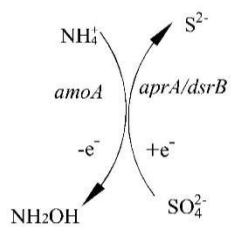

Aerobic ammonia oxidation-Sulfate reduction

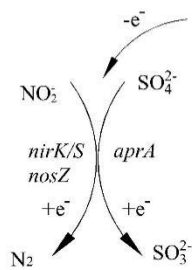

Denitrification-Sulfate reduction

612

613

614

**Fig.4.** Coupling of nitrogen / sulphur cycles in river sediments

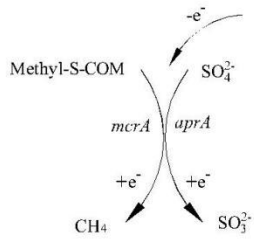

Methanogenesis-sulfate reduction

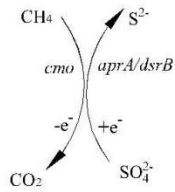

Anaerobic methane oxidation-sulfate reduction

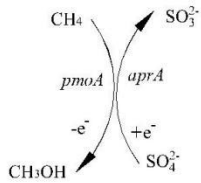

Aerobic methane oxidation-sulfate reduction

615

616

**Fig.5.** Coupling of methane / sulphur cycles in river sediments

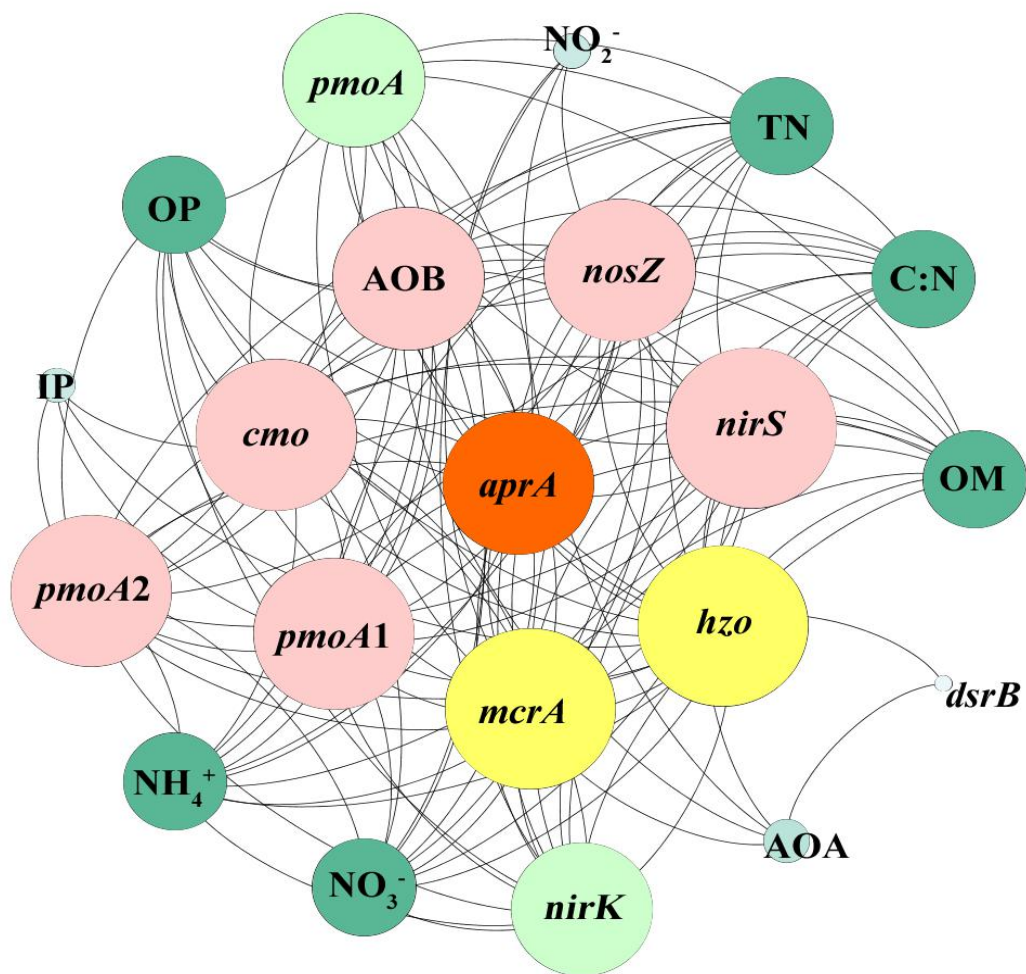

617  
 618 **Fig.6.** Relationships between different chemical properties and functional genes  
 619  
 620
